# Supplementary material for: Temsavir Modulates HIV-1 Envelope Conformation by Decreasing Its Proteolytic Cleavage
Source: MDPI journal article supplement (doi:10.3390/v15051189), 2023-05-18
Supplement: s1 [file s1]

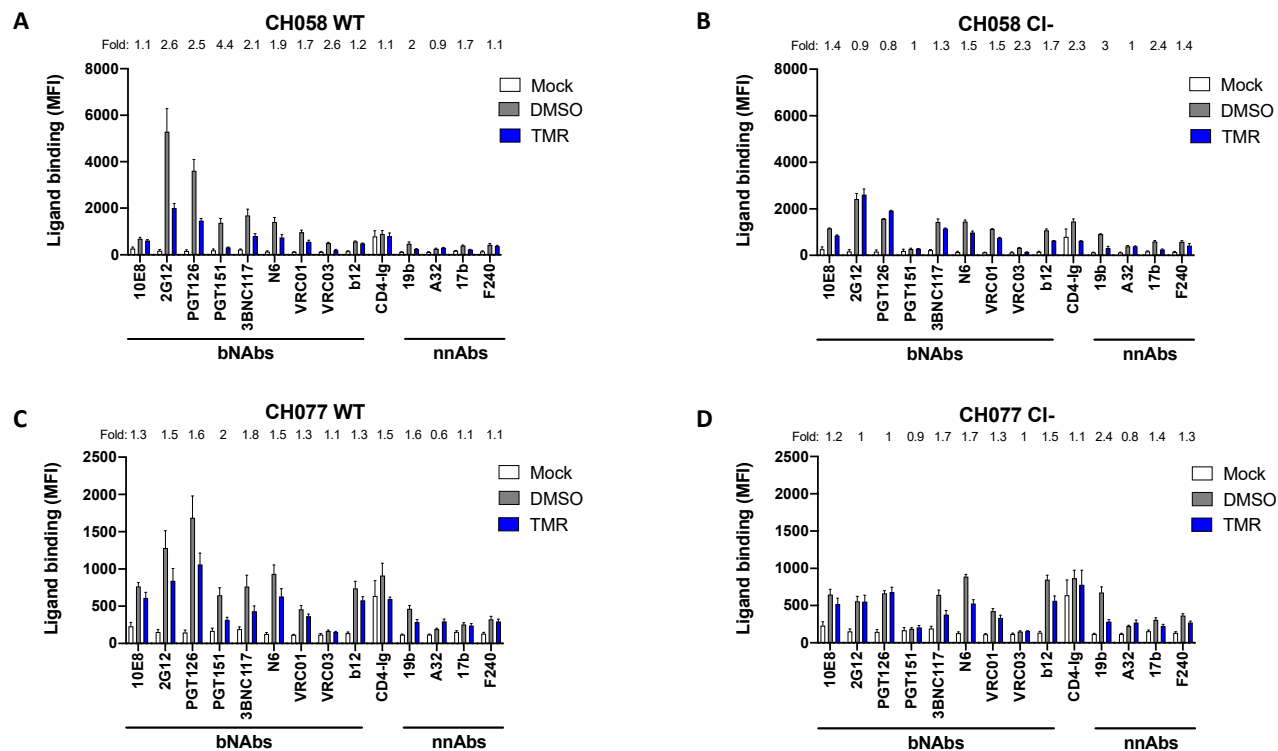

**Figure S1: Env cleavage affects the capacity of temsavir to modulate bNAb recognition of CH058 and CH077 Envs at the surface of HEK 293T cells.** HEK 293T cells were transfected with primary IMCs (A) CH058 WT, (B) CH058 Cl-, (C) CH077 WT, and (D) CH077 Cl-. Cells were then treated with 10  $\mu$ M temsavir (TMR) or the equivalent volume of DMSO for 24 h. Cell surface staining was performed using a panel of bNAbs (10E8, 2G12, PGT126, PGT151, 3BNC117, N6, VRC01, VRC03, and b12), nnAbs (19b, A32, 17b, and F240), and CD4-Ig. Shown are mean fluorescence intensities (MFI)  $\pm$  standard error of the mean (SEM). MFI values were determined on the transfected (p24+) population. The data shown represents results obtained from at least 2 independent experiments per ligand.

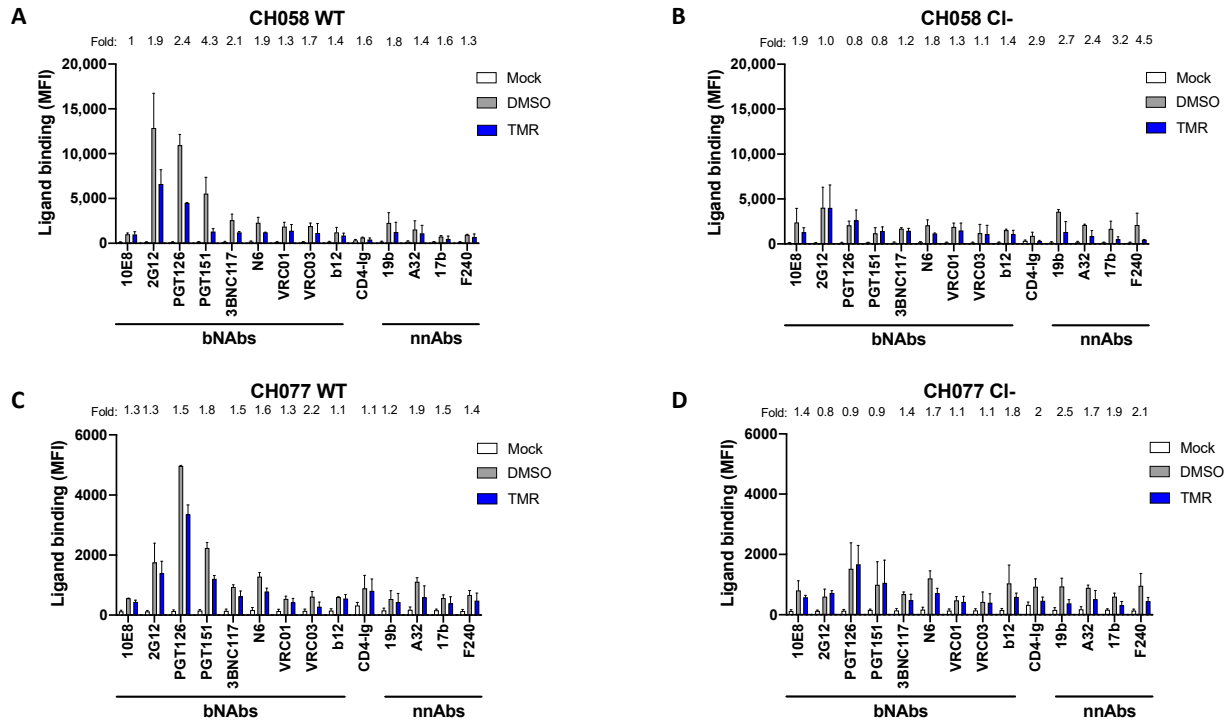

**Figure S2: Env cleavage affects the capacity of temsavir to modulate bNAbs recognition of CH058 and CH077 Envs at the surface of primary CD4<sup>+</sup> T cells.** Primary CD4<sup>+</sup> T cells were infected with (A) CH058 WT, (B) CH058 Cl-, (C) CH077 WT, and (D) CH077 Cl- viruses. Cells were then treated with 10  $\mu$ M temsavir (TMR) or the equivalent volume of DMSO for 24 h. Cell surface staining was performed using a panel of bNAbs (10E8, 2G12, PGT126, PGT151, 3BNC117, N6, VRC01, VRC03, and b12), nnAbs (19b, A32, 17b, and F240), and CD4-Ig. Shown are mean fluorescence intensities (MFI)  $\pm$  standard error of the mean (SEM). MFI values were determined on the transfected (p24<sup>+</sup>) population. The data shown represents results obtained from at least 2 independent experiments per ligand.

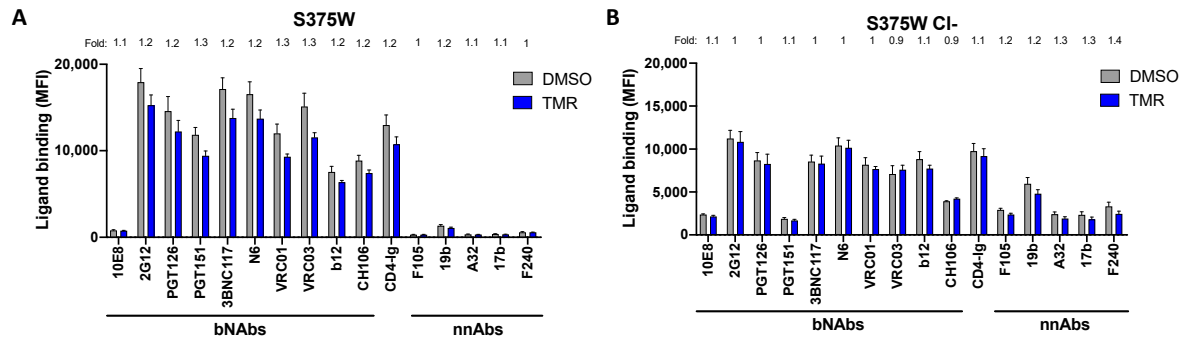

**Figure S3: Temsavir treatment does not affect ligand recognition for the resistant-mutants Env<sub>S375W</sub> and Env<sub>S375W Cl-</sub>.**

HEK 293T cells were transfected with a plasmid expressing (A) HIV-1<sub>JR-FL</sub> Env S375W or (B) HIV-1<sub>JR-FL</sub> Env S375W Cl-, together with a plasmid expressing GFP. Cells were then treated with 10  $\mu$ M temsavir (TMR) or the equivalent volume of DMSO for 24 h. Cell surface staining was performed using a panel of bNAbs (10E8, 2G12, PGT126, PGT151, 3BNC117, N6, VRC01, VRC03, b12, and CH106), nnAbs (F105, 19b, A32, 17b, and F240), and the ligand CD4-Ig. Shown are mean fluorescence intensities (MFI)  $\pm$  standard error of the mean (SEM). MFI values were measured on the transfected (GFP+) population. The data shown represents results obtained from at least four independent experiments for each ligand. Statistical significance was tested using a two-way analysis of variance (ANOVA).

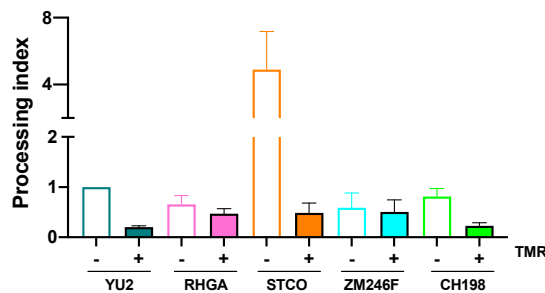

**Figure S4: Effect of temsavir on Env cleavage.**

HEK 293T cells were transfected with plasmids expressing Env (YU2, RHGA, STCO, ZM246F, and CH198) and labeled for 24 h with [<sup>35</sup>S] methionine and [<sup>35</sup>S] cysteine in the presence of 10  $\mu$ M temsavir or the equivalent volume of DMSO. Cell lysates and supernatants were immunoprecipitated with plasma from HIV-1-infected individuals. The precipitated proteins were load on SDS-PAGE gels and analyzed by autoradiography. The effect of temsavir on Env processing was quantified and normalized to YU2 in the presence vehicle (DMSO)

| Env    | Neutralization IC <sub>50</sub> (nM) |
|--------|--------------------------------------|
| YU2    | 0,22                                 |
| JRFL   | 0,16                                 |
| CH058  | 0,22                                 |
| CH077  | 0,13                                 |
| CH198  | 0,08                                 |
| STCO   | 1,30                                 |
| CH040  | 0,18                                 |
| ZM246F | 0,08                                 |
| BG505  | 6,40                                 |
| RHGA   | 0,18                                 |

**Table S1: Half-maximal inhibitory concentrations (IC<sub>50</sub>) of multiples HIV-1 strains by temsavir.** Pseudoviral particles coding for the luciferase reporter gene and bearing the following glycoproteins: JRFL, CH058, CH077, YU2, CH040, RHGA, BG505, STCO, ZM246F, and CH198 were used to infect Cf2Th-T4R5 cells. Pseudoviruses were incubated with increasing concentrations of temsavir for 1 h at 37°C prior infection. Data represents the average from at least three independent experiments.
